# Supplementary material for: The Relationship between Vegetable Intake and Weight Outcomes: A Systematic Review of Cohort Studies
Source: PubMed Central journal article supplement (PMC6266069; doi:10.3390/nu10111626), 2018-11-02
Supplement: nutrients-10-01626-s001.pdf [file nutrients-10-01626-s001.pdf]

**Table S1: Joanna Briggs Institute Critical Appraisal Checklist for Cohort Studies – Outcomes from the two reviewers**

| JBI Checklist no. Study       | 1. Two groups similar and recruited from the same population? |   |     | 2. Were the exposures measured similarly to assign people to both exposed and unexposed groups? |   |     | 3. Was the exposure measured in a valid and reliable way? |   |     | 4. Were confounding factors identified? |   |     | 5. Were strategies to deal with confounding factors stated? |   |     | 6. Were the groups/participants free of the outcome at the start of the study (or at the moment of exposure)? |   |     | 7. Were the outcomes measured in a valid and reliable way? |   |     | 8. Was the follow-up time reported and sufficient to be long enough for outcomes to occur? |   |     | 9. Was follow-up complete, and if not, were the reasons to loss of follow-up described and explored? |   |     | 10. Were strategies to address incomplete follow-up utilized? |   |     | 11. Was appropriate statistical analysis used? |   |   | Overall* |   |   |   |         |
|-------------------------------|---------------------------------------------------------------|---|-----|-------------------------------------------------------------------------------------------------|---|-----|-----------------------------------------------------------|---|-----|-----------------------------------------|---|-----|-------------------------------------------------------------|---|-----|---------------------------------------------------------------------------------------------------------------|---|-----|------------------------------------------------------------|---|-----|--------------------------------------------------------------------------------------------|---|-----|------------------------------------------------------------------------------------------------------|---|-----|---------------------------------------------------------------|---|-----|------------------------------------------------|---|---|----------|---|---|---|---------|
|                               | 1                                                             | 2 | 1&2 | 1                                                                                               | 2 | 1&2 | 1                                                         | 2 | 1&2 | 1                                       | 2 | 1&2 | 1                                                           | 2 | 1&2 | 1                                                                                                             | 2 | 1&2 | 1                                                          | 2 | 1&2 | 1                                                                                          | 2 | 1&2 | 1                                                                                                    | 2 | 1&2 | 1                                                             | 2 | 1&2 |                                                |   |   |          |   |   |   |         |
| Bertoia et al. (2015)[33]     | Y                                                             | Y | Y   | Y                                                                                               | Y | Y   | Y                                                         | Y | Y   | Y                                       | Y | Y   | Y                                                           | Y | Y   | N/A                                                                                                           | Y | Y   | Y                                                          | Y | Y   | Y                                                                                          | Y | Y   | Y                                                                                                    | Y | Y   | Y                                                             | Y | Y   | Y                                              | Y | Y | Y        | Y | Y | Y | Include |
| Butler et al. (2004)[34]      | Y                                                             | U | U   | Y                                                                                               | Y | Y   | Y                                                         | Y | Y   | N                                       | U | N   | N                                                           | U | N   | N/A                                                                                                           | Y | Y   | Y                                                          | Y | Y   | Y                                                                                          | N | Y   | N                                                                                                    | Y | U   | Y                                                             | N | Y   | N                                              | Y | Y | N        | Y | Y | N | Exclude |
| Esfahani et al. (2014)[35]    | Y                                                             | Y | Y   | Y                                                                                               | Y | Y   | Y                                                         | Y | Y   | N                                       | Y | N#  | Y                                                           | Y | Y   | N/A                                                                                                           | Y | Y   | Y                                                          | Y | Y   | Y                                                                                          | Y | Y   | Y                                                                                                    | U | N   | N                                                             | Y | Y   | Y                                              | Y | Y | Y        | Y | Y | Y | Include |
| Halkjaer et al. (2009)[36]    | Y                                                             | Y | Y   | Y                                                                                               | Y | Y   | N                                                         | Y | N#  | Y                                       | Y | Y   | Y                                                           | Y | Y   | N/A                                                                                                           | Y | Y   | Y                                                          | Y | Y   | Y                                                                                          | Y | Y   | Y                                                                                                    | N | N   | N                                                             | Y | Y   | Y                                              | Y | Y | Y        | Y | Y | Y | Include |
| He et al. (2004)[37]          | Y                                                             | Y | Y   | Y                                                                                               | Y | Y   | Y                                                         | Y | Y   | Y                                       | Y | Y   | Y                                                           | Y | Y   | N/A                                                                                                           | Y | Y   | Y                                                          | Y | Y   | Y                                                                                          | Y | Y   | Y                                                                                                    | N | N   | N                                                             | Y | Y   | Y                                              | Y | Y | Y        | Y | Y | Y | Include |
| Kahn et al 1997[38]           | Y                                                             | Y | Y   | Y                                                                                               | Y | Y   | U                                                         | N | N   | Y                                       | Y | Y   | U                                                           | Y | Y   | N/A                                                                                                           | U | N   | N                                                          | Y | Y   | Y                                                                                          | Y | Y   | Y                                                                                                    | U | U   | U                                                             | Y | Y   | Y                                              | Y | Y | Y        | Y | Y | Y | Exclude |
| Koenders et al. (2011)[39]    | Y                                                             | Y | Y   | N                                                                                               | Y | Y   | N                                                         | N | N   | N                                       | N | N   | N                                                           | U | N   | N/A                                                                                                           | N | N   | N                                                          | Y | Y   | Y                                                                                          | U | U   | U                                                                                                    | U | N   | N                                                             | N | Y   | Y                                              | Y | Y | Y        | Y | Y | Y | Exclude |
| Mozaffarian et al. (2011)[40] | Y                                                             | Y | Y   | Y                                                                                               | Y | Y   | Y                                                         | Y | Y   | Y                                       | Y | Y   | Y                                                           | Y | Y   | N/A                                                                                                           | Y | Y   | Y                                                          | Y | Y   | Y                                                                                          | Y | U   | Y                                                                                                    | Y | U   | Y                                                             | Y | Y   | Y                                              | Y | Y | Y        | Y | Y | Y | Include |
| Quick et al. (2013)[41]       | Y                                                             | Y | Y   | Y                                                                                               | Y | Y   | Y                                                         | Y | Y   | Y                                       | Y | Y   | Y                                                           | Y | Y   | N/A                                                                                                           | Y | Y   | Y                                                          | Y | Y   | Y                                                                                          | N | U   | N                                                                                                    | Y | U   | U                                                             | Y | Y   | Y                                              | Y | Y | Y        | Y | Y | Y | Include |
| Rautiainen et al. (2015)[42]  | Y                                                             | Y | Y   | U                                                                                               | Y | Y   | N                                                         | Y | N#  | Y                                       | Y | Y   | Y                                                           | U | Y   | N/A                                                                                                           | Y | Y   | Y                                                          | Y | Y   | Y                                                                                          | Y | U   | Y                                                                                                    | U | U   | U                                                             | Y | Y   | Y                                              | Y | Y | Y        | Y | Y | Y | Include |
| Sawada et al. (2015)[43]      | Y                                                             | Y | Y   | U                                                                                               | Y | Y   | N                                                         | Y | N#  | Y                                       | Y | Y   | Y                                                           | Y | Y   | N/A                                                                                                           | Y | Y   | Y                                                          | Y | Y   | Y                                                                                          | U | Y   | Y                                                                                                    | U | Y   | N                                                             | Y | Y   | Y                                              | Y | Y | Y        | Y | Y | Y | Include |
| Souza et al. (2018)[46]       | Y                                                             | Y | Y   | Y                                                                                               | Y | Y   | U                                                         | U | U#  | N                                       | U | N◆  | N                                                           | U | N◆  | N/A                                                                                                           | Y | Y   | Y                                                          | Y | Y   | Y                                                                                          | Y | Y   | Y                                                                                                    | U | N   | N                                                             | Y | Y   | Y                                              | Y | Y | Y        | Y | Y | Y | Exclude |
| Vergnaud et al. (2012)[44]    | Y                                                             | Y | Y   | Y                                                                                               | Y | Y   | N                                                         | Y | N#  | Y                                       | Y | Y   | Y                                                           | Y | Y   | N/A                                                                                                           | Y | Y   | Y                                                          | Y | Y   | Y                                                                                          | Y | U   | Y                                                                                                    | N | U   | N                                                             | Y | Y   | Y                                              | Y | Y | Y        | Y | Y | Y | Include |
| Vioque et al. (2008)[45]      | Y                                                             | Y | Y   | Y                                                                                               | Y | Y   | U                                                         | Y | N^  | Y                                       | Y | Y   | Y                                                           | Y | Y   | N/A                                                                                                           | Y | Y   | Y                                                          | Y | Y   | Y                                                                                          | N | Y   | N                                                                                                    | U | Y   | U                                                             | Y | U   | Y                                              | Y | U | Y        | Y | U | Y | Include |

\*Exclusion based on  $\geq 3$  criterion not met; #Only measured vegetable intake at baseline; ^ Adjusted for self-reported change in vegetable intake as “yes/no”, did not use validated food questionnaire at follow-up, "Adjusted for key confounders but no adjustments made for energy intake (kJ), ♦Adjusted for sex, follow-up time, initial BMI and initial waist circumference, but did not adjust for physical activity or energy intake (kJ). N/A; not applicable.

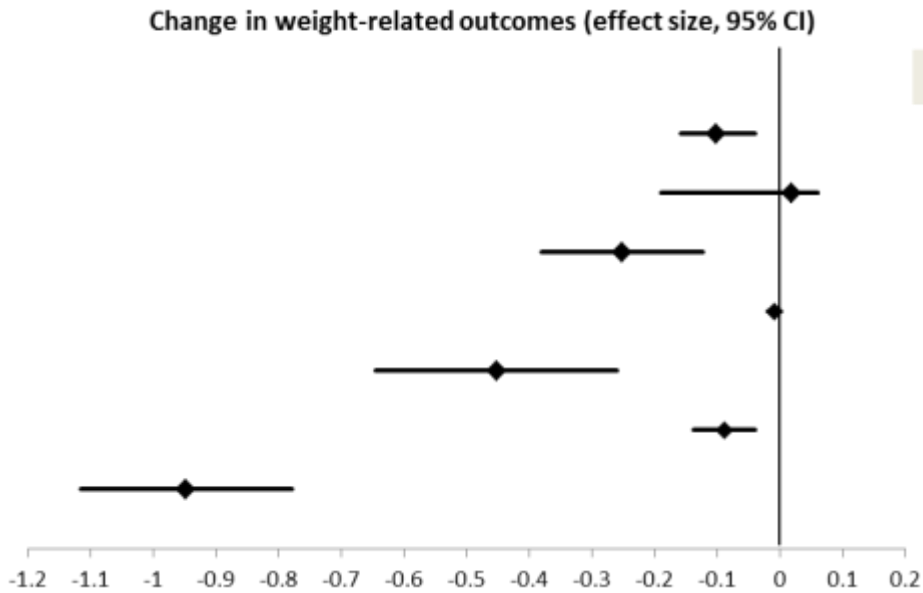

| Study Author, Year          | Weight-related outcome      |
|-----------------------------|-----------------------------|
| Quick et al, 2013 (Males)   | Risk of becoming overweight |
| Quick et al, 2013 (Females) | Risk of becoming overweight |
| Mozaffarian et al, 2011     | Weight loss                 |
| Bertoia et al, 2015         | Weight loss                 |
| Esfahani et al, 2014        | Weight loss                 |
| He et al, 2004              | Risk of Obesity             |
| Vioque et al, 2008          | Risk of weight gain         |

Figure S1: Forest Plot indicating the effect size calculated from odds ratios or the means and standard error for studies n=7 included in the review that measured change in vegetable intake over time. Studies which measured intake at baseline only, or were considered poor quality were excluded.
